# Supplementary material for: Genome-Wide Analysis in German Shepherd Dogs Reveals Association of a Locus on CFA 27 with Atopic Dermatitis
Source: PLOS journal article supplement (doi:10.1371/journal.pgen.1003475), 2013-05-09
Supplement: S2 (10.1371/journal.pgen.1003475.s002) [file journal.pgen.1003475.s002]

| Position               | Allele | Frequency |         | p-value                | p <sub>1,000,000 permutations</sub> |
|------------------------|--------|-----------|---------|------------------------|-------------------------------------|
|                        |        | Case      | Control |                        |                                     |
| 18934038 <sup>7</sup>  | G      | 0.401     | 0.167   | 1.3 x 10 <sup>-6</sup> | 3.1 x 10 <sup>-5</sup>              |
| 18934219 <sup>7</sup>  | C      | 0.401     | 0.167   | 1.3 x 10 <sup>-6</sup> | 3.1 x 10 <sup>-5</sup>              |
| 19140837 <sup>11</sup> | G      | 0.401     | 0.167   | 1.3 x 10 <sup>-6</sup> | 3.1 x 10 <sup>-5</sup>              |
| 19142893 <sup>11</sup> | G      | 0.400     | 0.167   | 1.5 x 10 <sup>-6</sup> | 3.2 x 10 <sup>-5</sup>              |
| 19121205 <sup>11</sup> | A      | 0.401     | 0.169   | 1.8 x 10 <sup>-6</sup> | 4.4 x 10 <sup>-5</sup>              |
| 18861228               | A      | 0.390     | 0.167   | 3.5 x 10 <sup>-6</sup> | 6.9 x 10 <sup>-5</sup>              |
| 18964049 <sup>7</sup>  | C      | 0.401     | 0.179   | 5.0 x 10 <sup>-6</sup> | 9.4 x 10 <sup>-5</sup>              |
| 18965475 <sup>7</sup>  | A      | 0.401     | 0.179   | 5.0 x 10 <sup>-6</sup> | 9.4 x 10 <sup>-5</sup>              |
| 18486594               | A      | 0.390     | 0.173   | 6.8 x 10 <sup>-6</sup> | 1.0 x 10 <sup>-4</sup>              |
| 19292898               | T      | 0.401     | 0.185   | 9.4 x 10 <sup>-6</sup> | 2.0 x 10 <sup>-4</sup>              |
| 19048938               | T      | 0.417     | 0.208   | 3.0 x 10 <sup>-5</sup> | 5.0 x 10 <sup>-4</sup>              |
| 19049048               | A      | 0.417     | 0.208   | 3.0 x 10 <sup>-5</sup> | 5.0 x 10 <sup>-4</sup>              |
| 18134508               | A      | 0.378     | 0.179   | 3.7 x 10 <sup>-5</sup> | 7.0 x 10 <sup>-4</sup>              |
| 19067992               | T      | 0.418     | 0.214   | 4.6 x 10 <sup>-5</sup> | 8.0 x 10 <sup>-4</sup>              |
| 18161172               | A      | 0.378     | 0.190   | 1.0 x 10 <sup>-4</sup> | 0.0020                              |
| 18874358               | A      | 0.404     | 0.214   | 1.0 x 10 <sup>-4</sup> | 0.0024                              |
| 18699406               | G      | 0.187     | 0.054   | 1.0 x 10 <sup>-4</sup> | 0.0026                              |
| 19264902               | T      | 0.192     | 0.060   | 2.0 x 10 <sup>-4</sup> | 0.0036                              |
| 18223070               | G      | 0.374     | 0.202   | 4.0 x 10 <sup>-4</sup> | 0.0067                              |
| 18804142               | G      | 0.409     | 0.241   | 0.0010                 | 0.0147                              |
| 18582103               | A      | 0.172     | 0.060   | 0.0011                 | 0.0164                              |
| 18131103               | T      | 0.170     | 0.060   | 0.0013                 | 0.0187                              |
| 18207512               | A      | 0.170     | 0.060   | 0.0013                 | 0.0187                              |
| 18581634               | C      | 0.170     | 0.060   | 0.0013                 | 0.0187                              |
| 17944696               | T      | 0.156     | 0.054   | 0.0020                 | 0.0278                              |
| 18082732               | A      | 0.172     | 0.065   | 0.0023                 | 0.0308                              |
| 18443579               | T      | 0.172     | 0.065   | 0.0023                 | 0.0308                              |
| 17751542               | A      | 0.422     | 0.268   | 0.0025                 | 0.0333                              |
| 17760444               | A      | 0.422     | 0.268   | 0.0025                 | 0.0333                              |
| 18581490               | C      | 0.165     | 0.061   | 0.0026                 | 0.0336                              |
| 17848875               | C      | 0.390     | 0.244   | 0.0034                 | 0.0436                              |
| 18207618               | A      | 0.157     | 0.060   | 0.0036                 | 0.0464                              |
| 19097445               | G      | 0.209     | 0.101   | 0.0057                 | 0.0729                              |
| 19118236               | T      | 0.209     | 0.101   | 0.0057                 | 0.0729                              |
| 17716804               | A      | 0.165     | 0.071   | 0.0072                 | 0.0868                              |
| 19007501               | G      | 0.200     | 0.101   | 0.0104                 | 0.1284                              |
| 19021017               | C      | 0.200     | 0.101   | 0.0104                 | 0.1284                              |
| 19048269               | A      | 0.209     | 0.113   | 0.0154                 | 0.1682                              |
| 17684210               | A      | 0.159     | 0.077   | 0.0184                 | 0.1960                              |
| 18605999               | G      | 0.198     | 0.107   | 0.0190                 | 0.1998                              |
| 17456020               | C      | 0.208     | 0.131   | 0.0573                 | 0.4301                              |
| 17527731               | G      | 0.005     | 0.000   | 0.3360                 | 0.9719                              |

<sup>7</sup>SNPs part of block 7, <sup>11</sup>SNPs part of block 11
